# Supplementary material
Source: PubMed Central journal article supplement (PMC3119349)

# Supplemental Fig.1

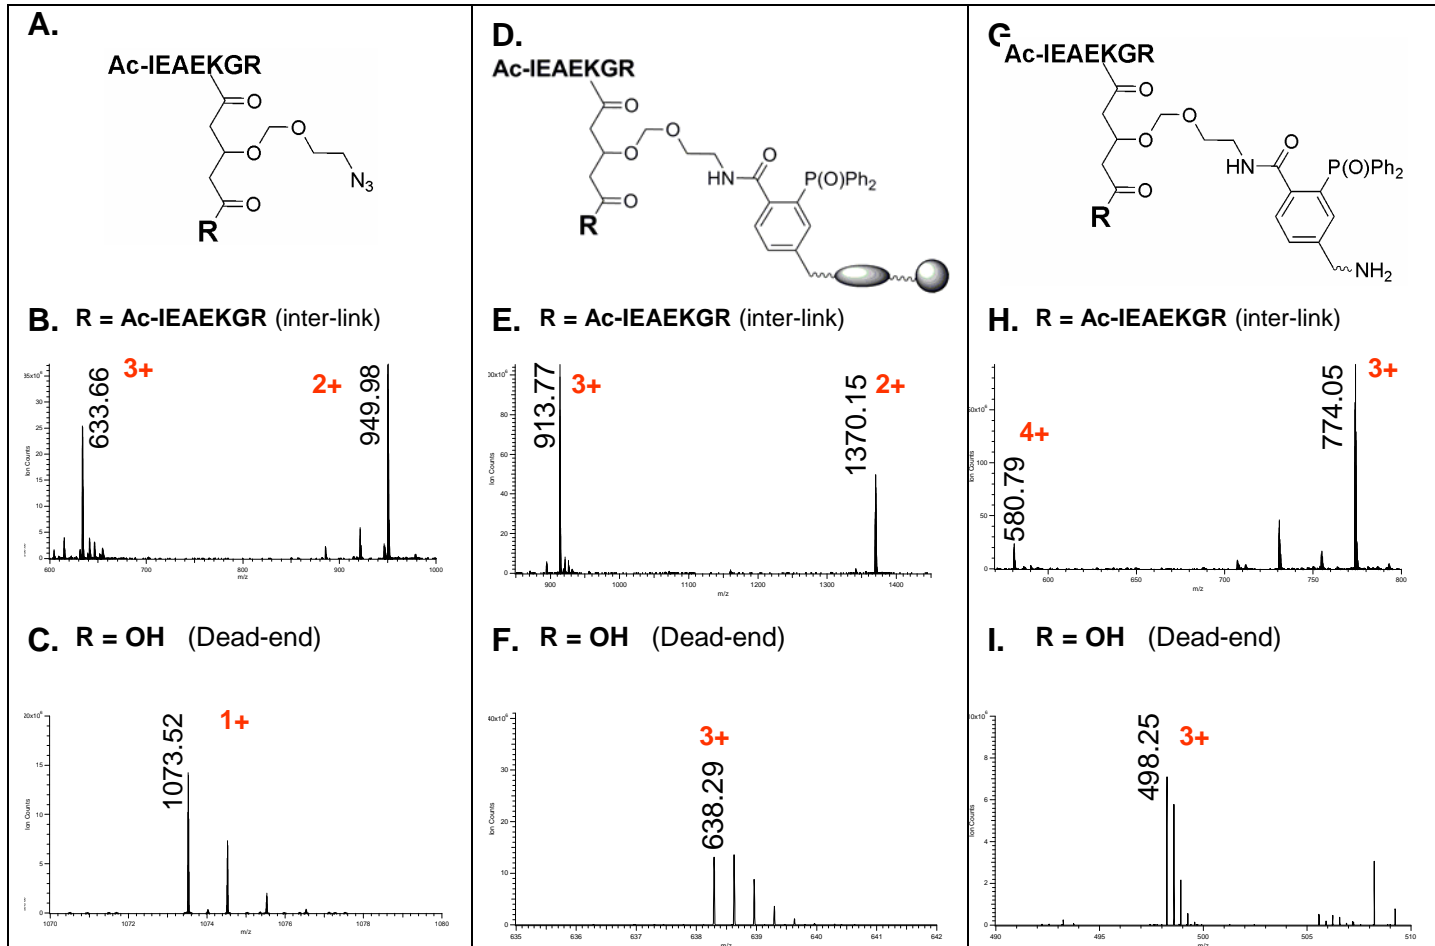

## Supplemental Fig.2

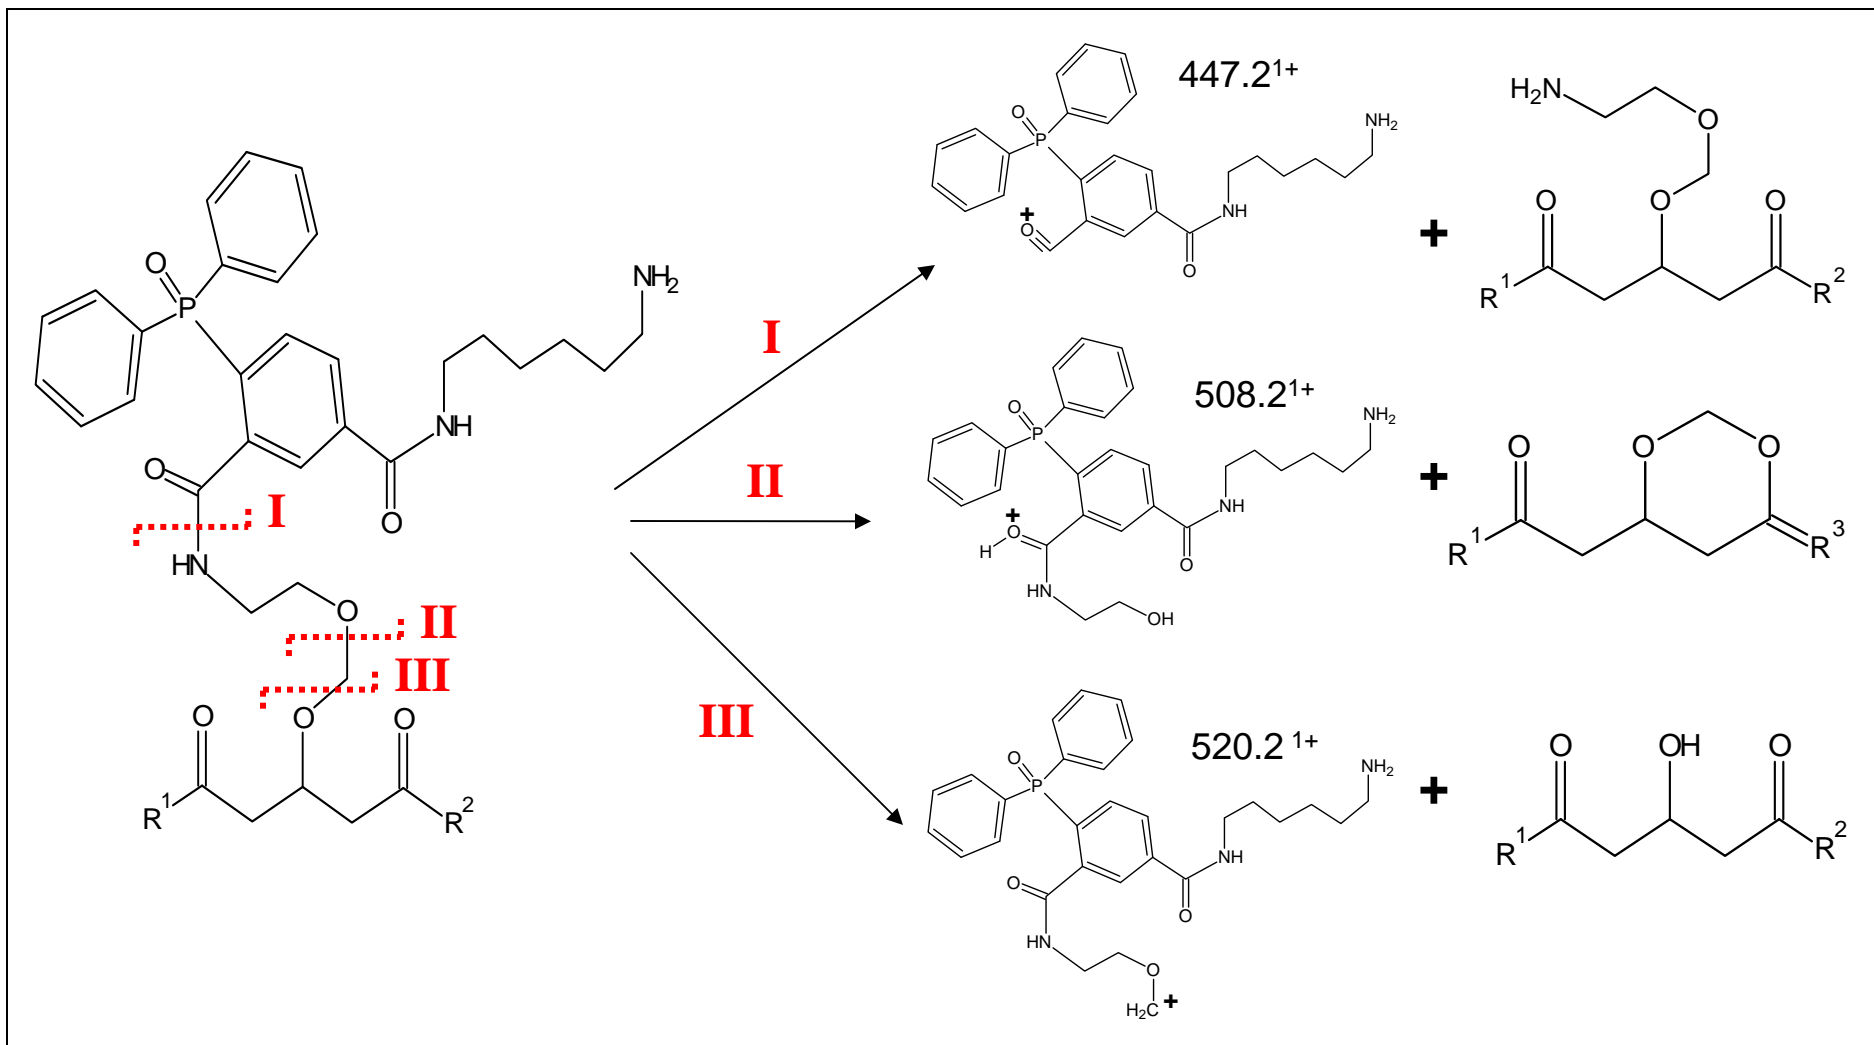

R<sup>1</sup> = Lysine ε nitrogen

R<sup>2</sup> = Lysine ε nitrogen (inter-, intra-link) or hydroxyl group (dead-end)

R<sup>3</sup> = Lysine ε nitrogen (inter-, intra-link) or oxygen (dead-end)

# Supplemental Fig.3

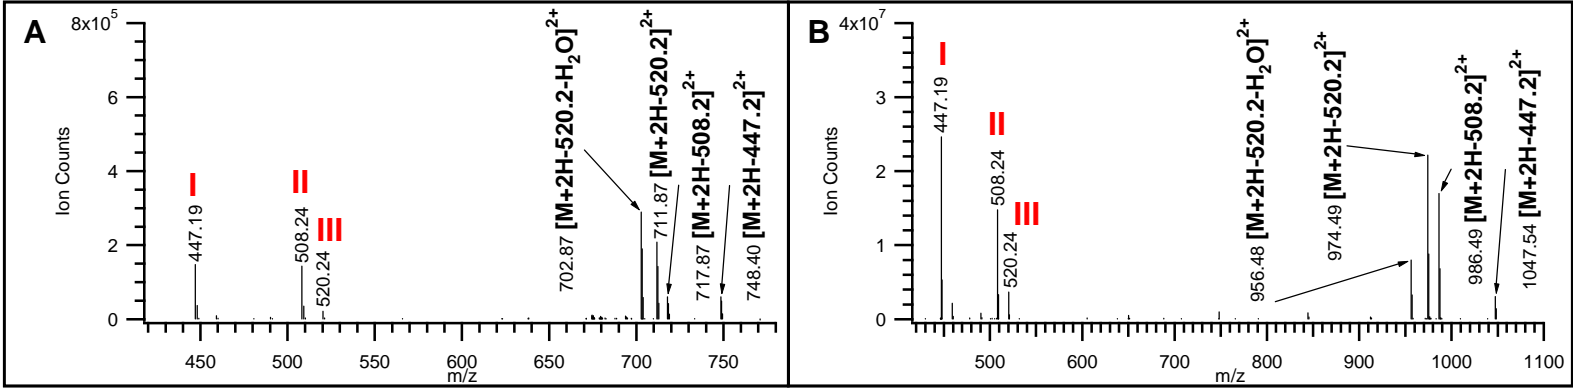

# Supplemental Fig.4

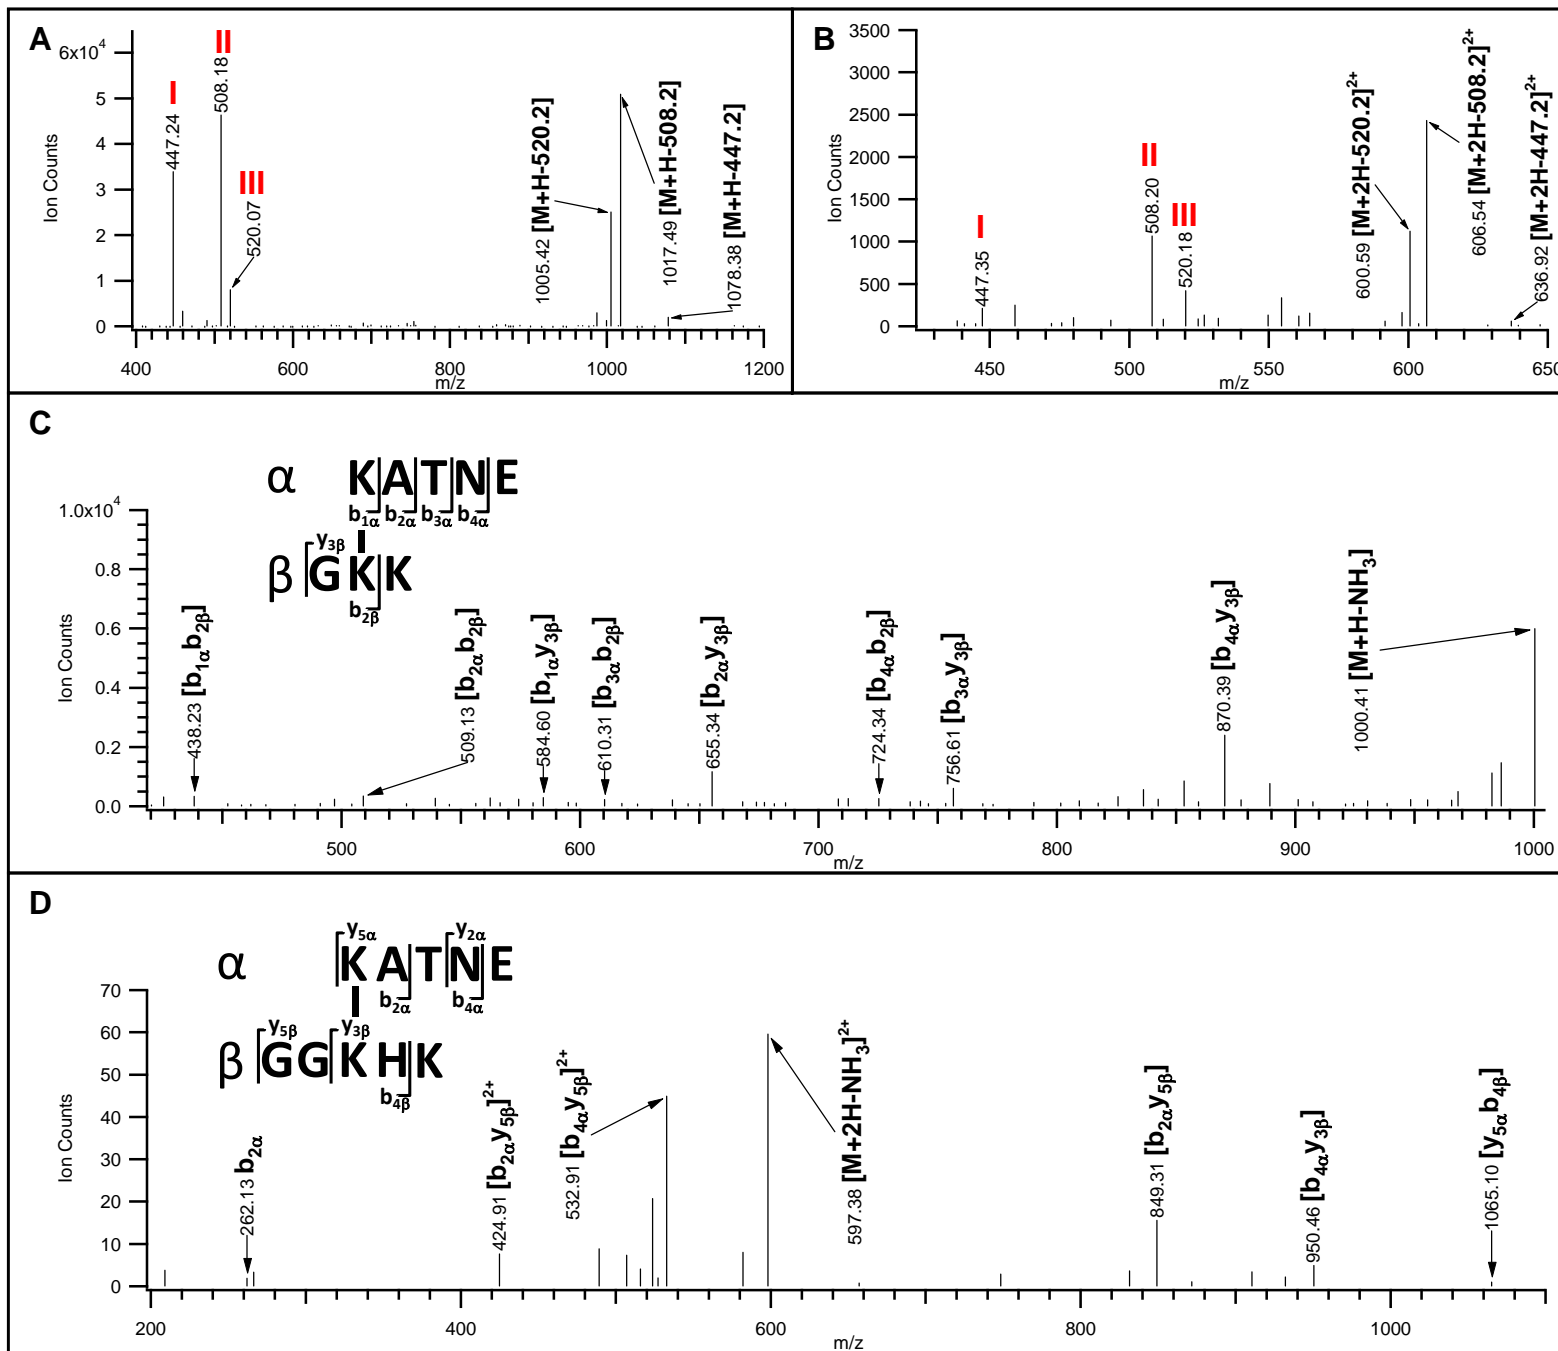

# Supplemental Fig.5

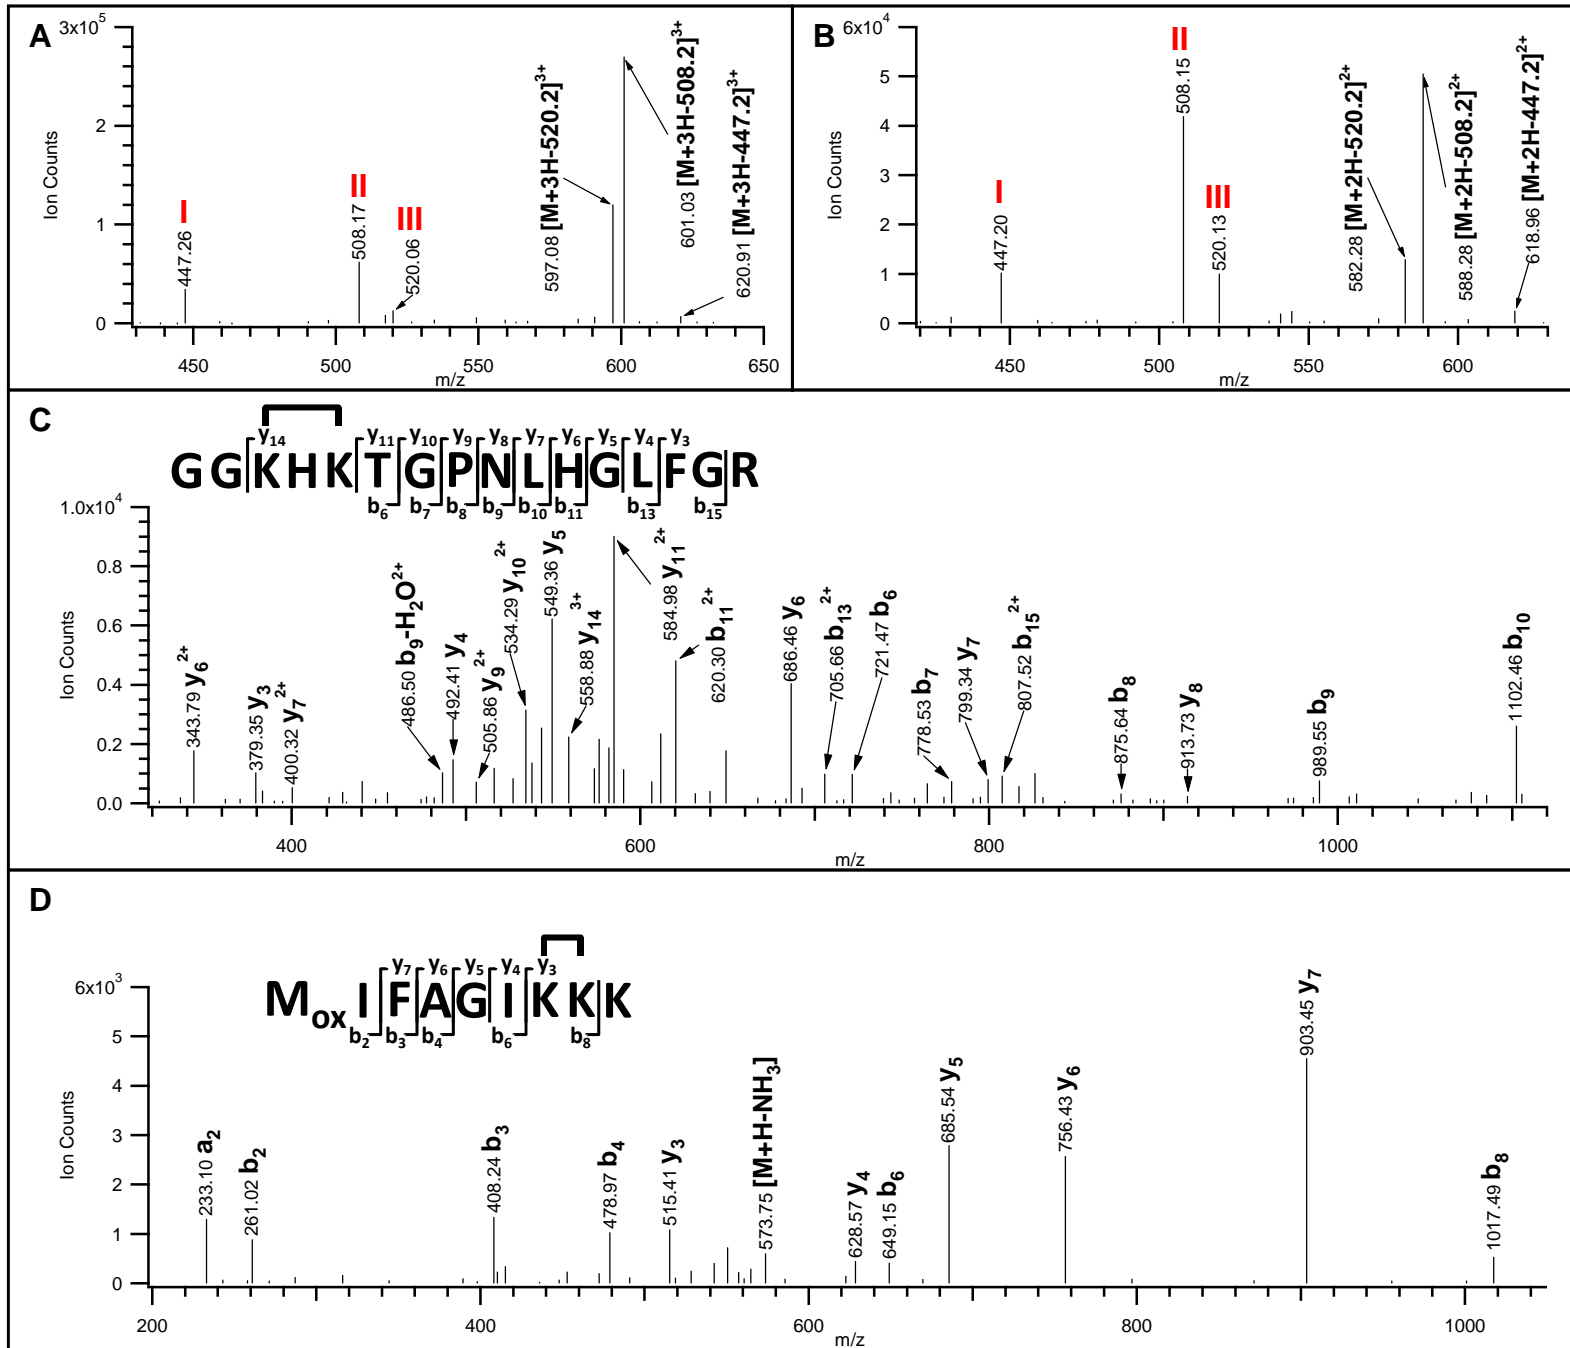

Supplement: NIHMS198423-supplement-04.pdf [file NIHMS198423-supplement-04.pdf]
